# Supplementary material for: Administration of two probiotic strains during early childhood does not affect the endogenous gut microbiota composition despite probiotic proliferation
Source: PubMed Central journal article supplement (PMC5561568; doi:10.1186/s12866-017-1090-7), 2017-08-17
Supplement: 12866_2017_1090_MOESM1_ESM.pdf [file 12866_2017_1090_MOESM1_ESM.pdf]

## **Additional file 1**

**Additional material related to:**

**Administration of two probiotic strains during early childhood does not affect the endogenous gut microbiota composition despite probiotic proliferation**

by

*Martin Frederik Laursen, Rikke Pilmann Laursen, Anni Larnkjær, Kim F. Michaelsen, Martin Iain Bahl & Tine Rask Licht.*

### **Content:**

Table S1 – Primers used to detect and quantify BB-12® and LGG®

Table S2 – Strains used for evaluation of primer specificity

Table S3 – OTUs with differential abundance comparing baseline samples

Table S4 – OTUs with differential abundance comparing samples with BB-12® growth to placebo

Table S5 – OTUs with differential abundance comparing samples with LGG® growth to placebo

Figure S1 – Gut microbiota changes over the course of the 6 months intervention

Figure S2 – Gut microbiota at baseline does not differ between probiotics and placebo groups

Figure S3 – Evaluation of primer specificity for LGG® and BB-12® primers

Figure S4 – Gut microbial alpha diversity measures are not affected by active growth of probiotics

Additional references

**Table S1** – Primers used to detect and quantify BB12 and LGG

| Primers       | Sequence (5'-3')        | Primer length | Tm (°C) | GC % | Product size (bp) | Target                        |
|---------------|-------------------------|---------------|---------|------|-------------------|-------------------------------|
| <b>BB12_F</b> | ACTTCAATCGCTCGGCTGATGTA | 23            | 65.3    | 47.8 | 154               | Type I-U CRISPR-Cas7 gene [1] |
| <b>BB12_R</b> | TCGTAGCTCCTGCAAAATACACT | 23            | 60.3    | 43.5 |                   |                               |
| <b>LGG_F</b>  | GTCAACCATTGCTTGCCCTT    | 20            | 62.3    | 50.0 | 202               | Phage-related gene [2]        |
| <b>LGG_R</b>  | AGAAAAGACACCGGGTTTGC    | 20            | 61.4    | 50.0 |                   |                               |

**Table S2** – Strains used for evaluation of primer specificity

| Strain                                                     | Culture Collection |
|------------------------------------------------------------|--------------------|
| <i>Lactobacillus rhamnosus</i> GG                          | ATCC 53103         |
| <i>Lactobacillus rhamnosus</i>                             | DSM 20021          |
| <i>Lactobacillus paracasei</i> subsp. <i>paracasei</i> 85E | DSM 20006          |
| <i>Lactobacillus acidophilus</i> L917                      | DSM 20079          |
| <i>Lactobacillus johnsonii</i> VPI 7660                    | DSM 10533          |
| <i>B. animalis</i> subsp. <i>lactis</i> UR1                | DSM 10140          |
| <i>B. animalis</i> subsp. <i>lactis</i> BB-12              | Chr. Hansen A/S    |
| <i>B. animalis</i> subsp. <i>lactis</i> BL-04              | SD5219             |
| <i>B. breve</i> S50                                        | DSM 20091          |
| <i>B. animalis</i> subsp. <i>animalis</i>                  | DSM 20104          |
| <i>B. pseudolongum</i> subsp. <i>pseudolongum</i>          | DSM 20099          |

**Table S3** – OTUs with crude p-value below 0.05 for differential abundance comparing baseline samples of completers assigned to probiotics (n = 95) vs. placebo (n = 89).

| OTU ID  | P-value <sup>a</sup> | FDR P-value <sup>b</sup> | Mean abundance (%) |                     | Green Genes taxonomy       |
|---------|----------------------|--------------------------|--------------------|---------------------|----------------------------|
|         |                      |                          | Placebo (n = 89)   | Probiotics (n = 95) |                            |
| OTU_76  | 0.025                | 0.996                    | 0.035%             | 0.085%              | <i>Erysipelotrichaceae</i> |
| OTU_374 | 0.026                | 0.996                    | 0.022%             | 0.053%              | <i>Moryella</i>            |
| OTU_916 | 0.031                | 0.996                    | 0.140%             | 0.021%              | <i>Bacteroides caccae</i>  |
| OTU_106 | 0.033                | 0.996                    | 0.048%             | 0.011%              | <i>Sutterella</i>          |
| OTU_304 | 0.040                | 0.996                    | 0.008%             | 0.002%              | <i>Erysipelotrichaceae</i> |
| OTU_800 | 0.043                | 0.996                    | 0.003%             | 0.005%              | <i>Lachnospiraceae</i>     |

<sup>a</sup>P-value according to Mann Whitney test.<sup>b</sup>False Discovery Rate correction of the P-values.

**Table S4** – OTUs with crude p-value below 0.05 for differential abundance comparing samples with BB-12<sup>®</sup> growth (n = 86) vs. placebo (n = 98).

| OTU ID  | P-value <sup>a</sup> | FDR P-value <sup>b</sup> | Mean abundance (%) |                                    | Green Genes taxonomy                  |
|---------|----------------------|--------------------------|--------------------|------------------------------------|---------------------------------------|
|         |                      |                          | Placebo (n = 98)   | BB-12 <sup>®</sup> growth (n = 86) |                                       |
| OTU_3   | 0.009                | 0.983                    | 7.644%             | 4.921%                             | <i>Bifidobacterium</i>                |
| OTU_334 | 0.021                | 0.983                    | 0.001%             | 0.051%                             | <i>Sutterella</i>                     |
| OTU_60  | 0.022                | 0.983                    | 0.117%             | 0.182%                             | [ <i>Barnesiellaceae</i> ]            |
| OTU_290 | 0.031                | 0.983                    | 0.004%             | 0.011%                             | <i>Butyricimonas</i>                  |
| OTU_6   | 0.034                | 0.983                    | 5.504%             | 3.293%                             | <i>Pseudobutyrvibrio</i>              |
| OTU_575 | 0.036                | 0.983                    | <0.001%            | 0.062%                             | [ <i>Eubacterium</i> ] <i>biforme</i> |
| OTU_181 | 0.042                | 0.983                    | 0.015%             | 0.003%                             | <i>Lactococcus</i>                    |
| OTU_25  | 0.042                | 0.983                    | 1.457%             | 0.949%                             | <i>Ruminococcus bromii</i>            |
| OTU_313 | 0.048                | 0.983                    | 0.173%             | 0.143%                             | <i>Bacteroides acidifaciens</i>       |

<sup>a</sup>P-value according to Mann Whitney test.

<sup>b</sup>False Discovery Rate correction of the P-values.

**Table S5** – OTUs with crude p-value below 0.05 for differential abundance comparing samples with LGG<sup>®</sup> growth (n = 46) vs. placebo (n = 98).

| OTU ID  | P-value <sup>a</sup> | FDR P-value <sup>b</sup> | Mean abundance (%) |                                  | Green Genes taxonomy                  |
|---------|----------------------|--------------------------|--------------------|----------------------------------|---------------------------------------|
|         |                      |                          | Placebo (n = 98)   | LGG <sup>®</sup> growth (n = 46) |                                       |
| OTU_575 | 0.0194               | 0.974                    | <0.001%            | 0.087%                           | [ <i>Eubacterium</i> ] <i>biforme</i> |
| OTU_6   | 0.0369               | 0.974                    | 5.504%             | 2.464%                           | <i>Pseudobutyrvibrio</i>              |
| OTU_217 | 0.0383               | 0.974                    | 0.000%             | <0.001%                          | <i>Clostridiales</i>                  |
| OTU_230 | 0.0383               | 0.974                    | 0.000%             | 0.002%                           | <i>Ruminococcaceae</i>                |
| OTU_189 | 0.047                | 0.974                    | 0.014%             | 0.000%                           | <i>Megasphaera</i>                    |
| OTU_575 | 0.0194               | 0.974                    | <0.001%            | 0.087%                           | [ <i>Eubacterium</i> ] <i>biforme</i> |

<sup>a</sup>P-value according to Mann Whitney test.

<sup>b</sup>False Discovery Rate correction of the P-values.

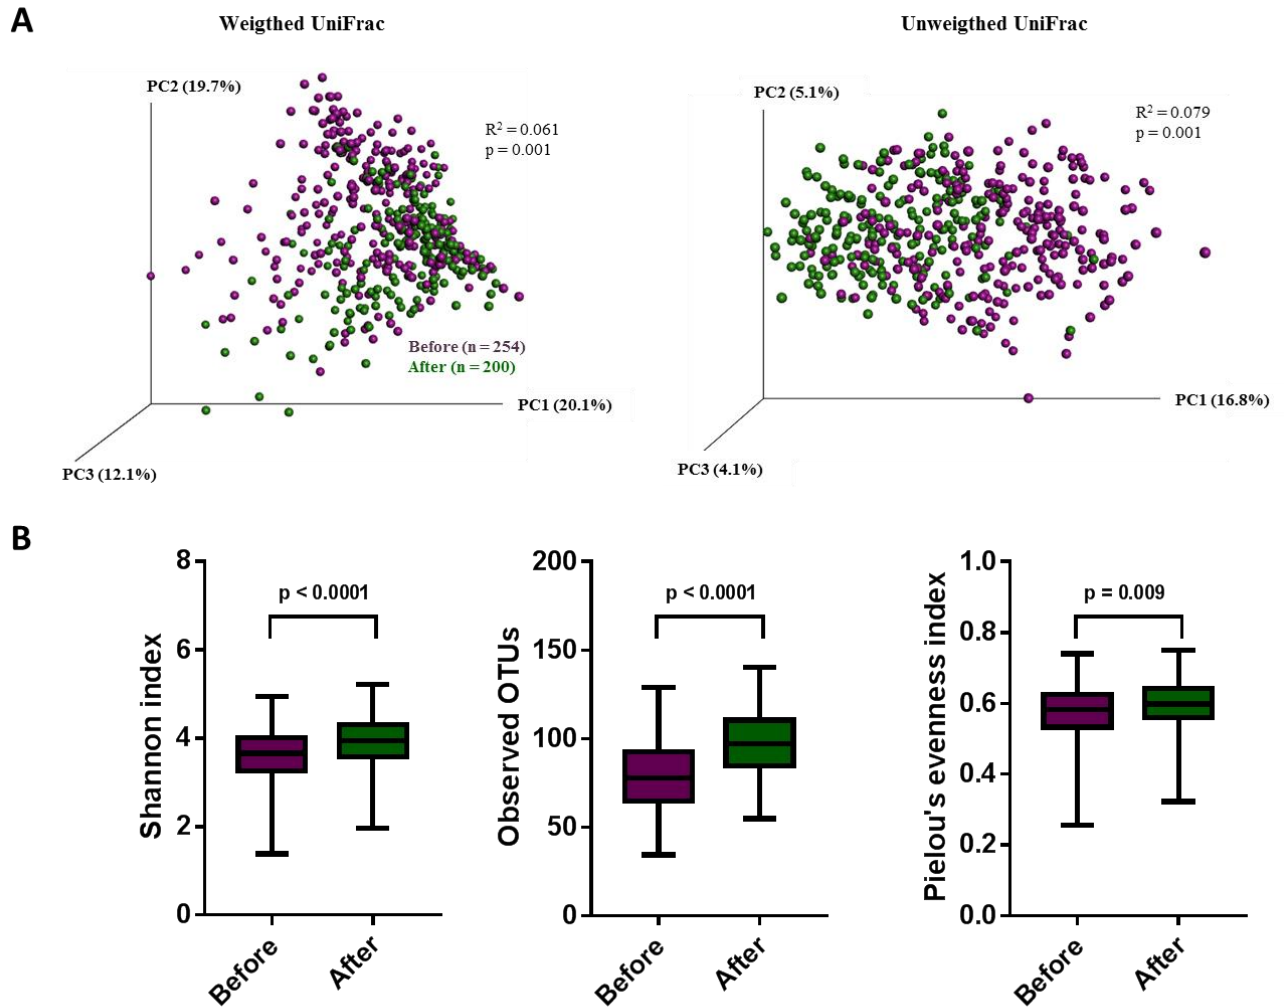

**Figure S1** – Gut microbiota changes over the course of the 6 months intervention.

A) PCoA plots of weighted and unweighted UniFrac distances of the gut microbiota, B) boxplots of gut microbial alpha diversity measures before (purple) and after (green) intervention.

**A**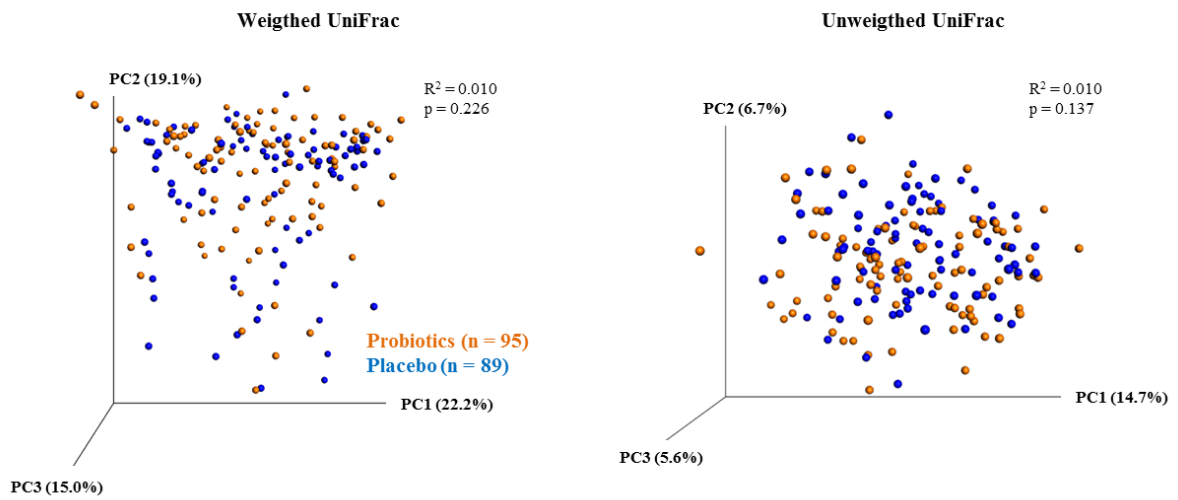**B**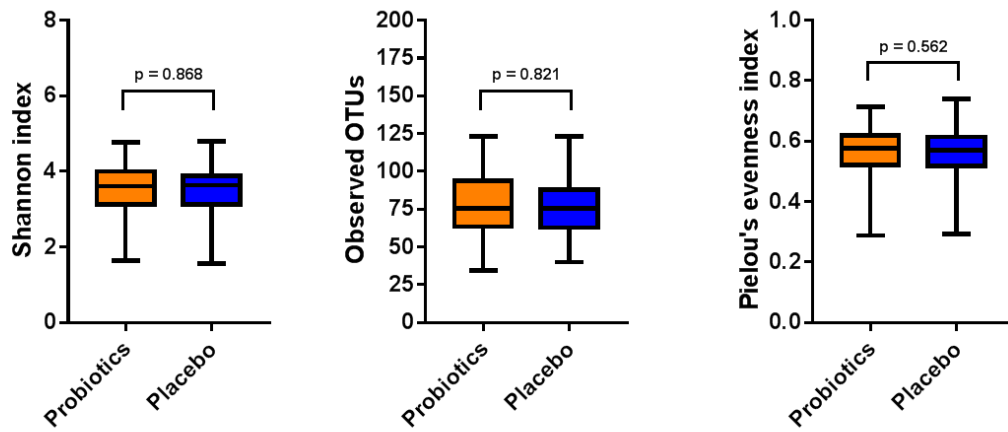

**Figure S2** – Gut microbiota at baseline does not differ between probiotics and placebo groups.

A) PCoA plots of weighted and unweighted UniFrac distances of the gut microbiota, B) boxplots of gut microbial alpha diversity measures for individuals assigned to probiotics (orange) and placebo (blue) treatments.

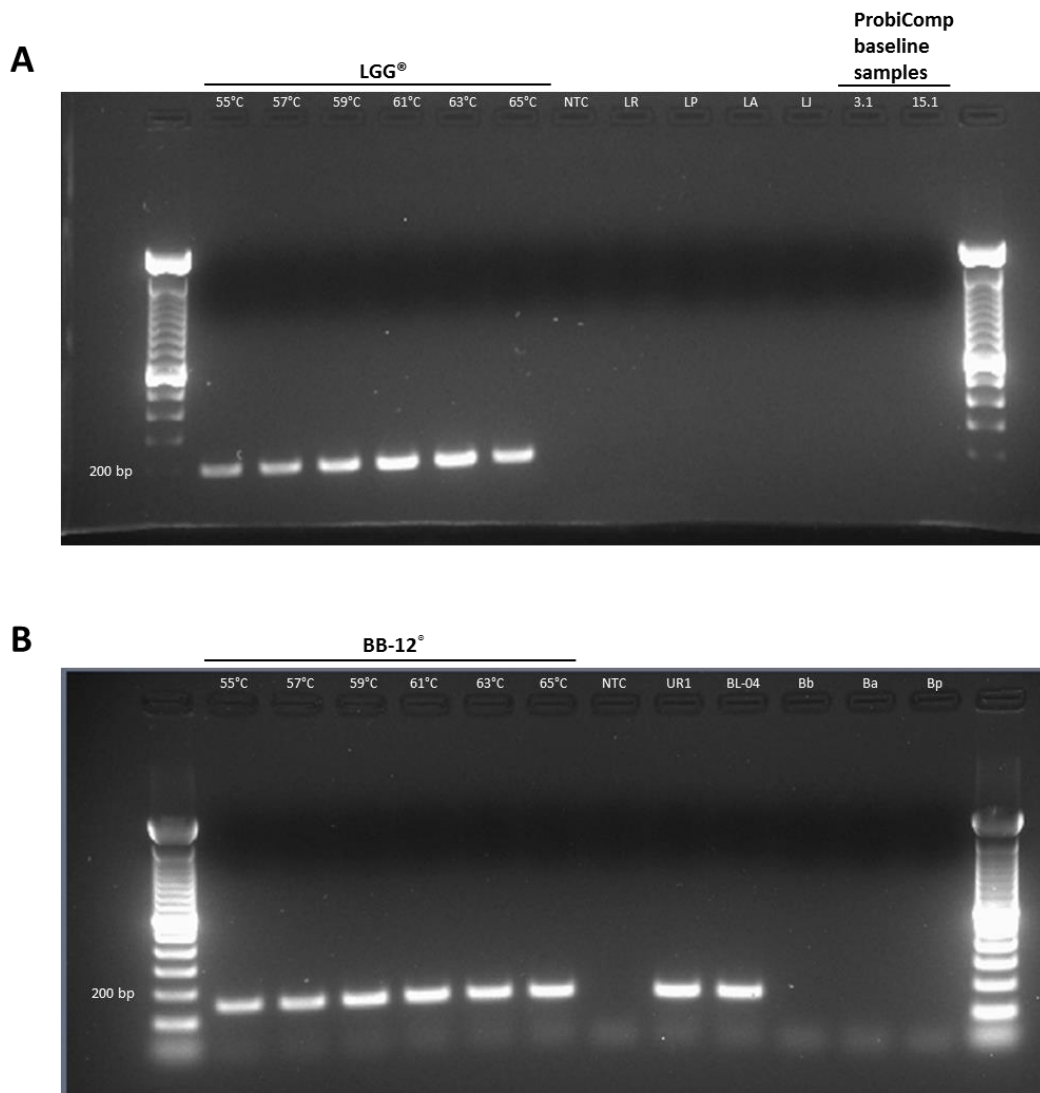

**Figure S3** – Evaluation of primer specificity for LGG<sup>®</sup> and BB-12<sup>®</sup> primers.

A) UV image of a gel containing PCR products obtained with extracted DNA from *Lactobacillus rhamnosus* (LGG<sup>®</sup> at different annealing temperatures), none template control (NTC), *L. rhamnosus* DSM 20021 (LR), *L. paracasei* subsp. *paracasei* 85E DSM 20006 (LP), *L. acidophilus* L917 DSM 20079 (LA), *L. johnsonii* VPI 7660 DSM 10533 (LJ) or ProbiComp baseline samples (3.1 and 15.1) using LGG<sup>®</sup> primers. B) UV image of a gel containing PCR products obtained with extracted DNA from *B. animalis* subsp. *lactis* (BB-12<sup>®</sup> at different annealing temperatures), none template control (NTC), *B. animalis* subsp. *lactis* UR1 DSM 10140 (UR1), *B. animalis* subsp. *lactis* BL-04 SD5219 (BL-04), *B. breve* S50 DSM 20091 (Bb), *B. animalis* subsp. *animalis* DSM 20104 (Ba) or *B. pseudolongum* subsp. *pseudolongum* DSM 20099 (Bp) using BB-12<sup>®</sup> primers. A 100 bp DNA ladder (Invitrogen, 15628019) is included in the first and last wells for comparison of basepair size.

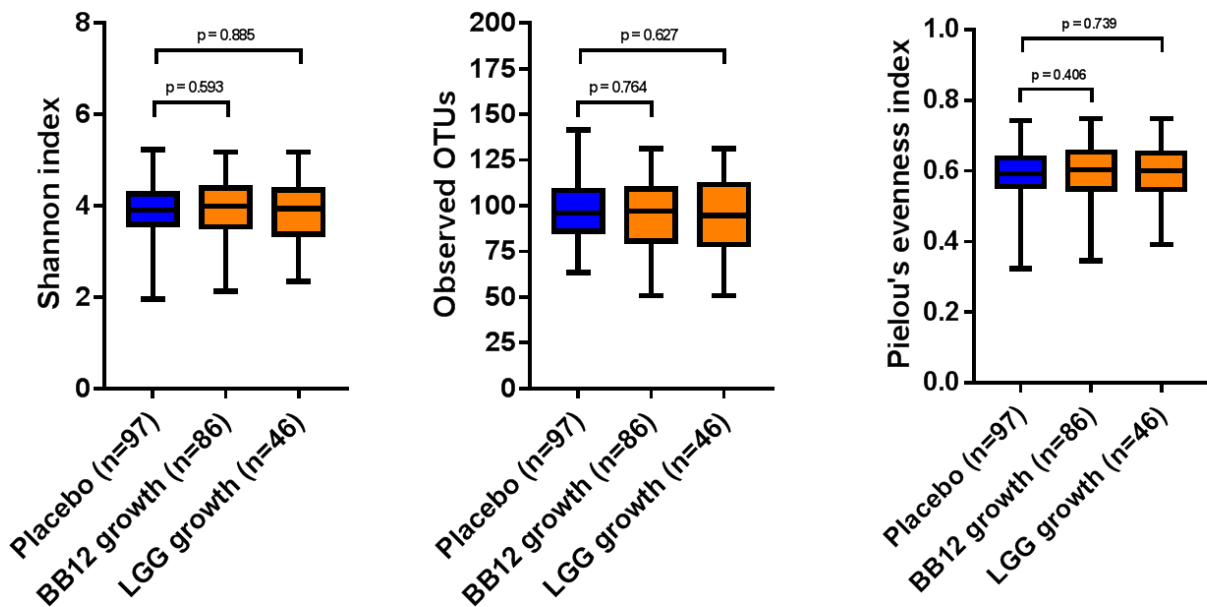

**Figure S4** – Gut microbial alpha diversity measures are not affected by active growth of probiotics. Boxplots of gut microbial alpha diversity measures for individuals with detected growth of BB-12<sup>®</sup> (n = 86) or LGG<sup>®</sup> (n = 46) as compared to placebo (n = 97).

#### Additional References

1. Briner AE, Lugli GA, Milani C, Duranti S, Turrone F, Gueimonde M, et al. Occurrence and Diversity of CRISPR-Cas Systems in the Genus *Bifidobacterium*. Riedel CU, editor. PLoS One [Internet]. Public Library of Science; 2015 [cited 2016 Jul 1];10:e0133661. Available from: <http://dx.plos.org/10.1371/journal.pone.0133661>
2. Endo A, Aakko J, Salminen S, Ahlroos T, Tynkkynen S, Brandt K, et al. Evaluation of strain-specific primers for identification of *Lactobacillus rhamnosus* GG. FEMS Microbiol. Lett. [Internet]. The Oxford University Press; 2012 [cited 2016 Jul 1];337:120–5. Available from: <http://www.ncbi.nlm.nih.gov/pubmed/23003331>
